# Supplementary material for: Facile synthesis of sheet-like N–TiO2/g-C3N4heterojunctions with highly enhanced and stable visible-light photocatalytic activities
Source: Royal Society of Chemistry journal article supplement (doi:10.1039/c5ra04100g), 2015-01-01

# Facile synthesis of sheet-like N-TiO<sub>2</sub>/g-C<sub>3</sub>N<sub>4</sub> heterojunctions with highly enhanced and stable visible-light photocatalytic activities

Wei Li,<sup>†</sup> Cheng Li,<sup>\*,‡</sup> Bo Chen,<sup>‡</sup> Xiuling Jiao<sup>\*,†‡</sup> and Dairong Chen<sup>†‡</sup>

<sup>†</sup>School of Chemistry and Chemical Engineering, Shandong University, Jinan 250100, P. R. China

<sup>‡</sup>National Engineering Research Center for Colloidal Materials, Shandong University, Jinan 250100, P. R. China

E-mails: [chengli@sdu.edu.cn](mailto:chengli@sdu.edu.cn), [jiaoxl@sdu.edu.cn](mailto:jiaoxl@sdu.edu.cn)

**Figure S1.** FT-IR spectra (a) and XRD patterns (b) of p-g-C<sub>3</sub>N<sub>4</sub> and g-C<sub>3</sub>N<sub>4</sub>.

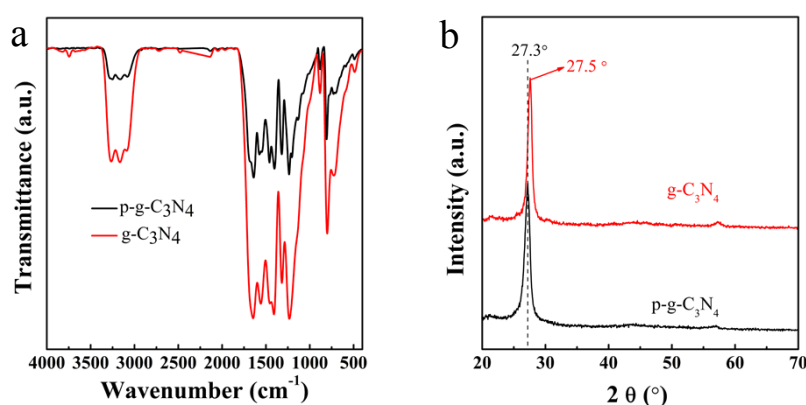

**Figure S2.** N<sub>2</sub> adsorption-desorption isotherm of bulk p-g-C<sub>3</sub>N<sub>4</sub> and g-C<sub>3</sub>N<sub>4</sub> nanosheets.

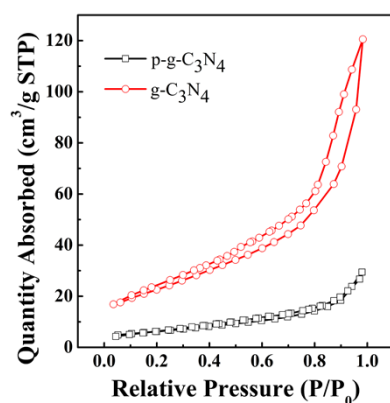

**Scheme S1.** Proposed self-polymerization of NH<sub>4</sub>SCN to carbon nitride network under oxygen lack (a) and oxygen enrichment (b) conditions.

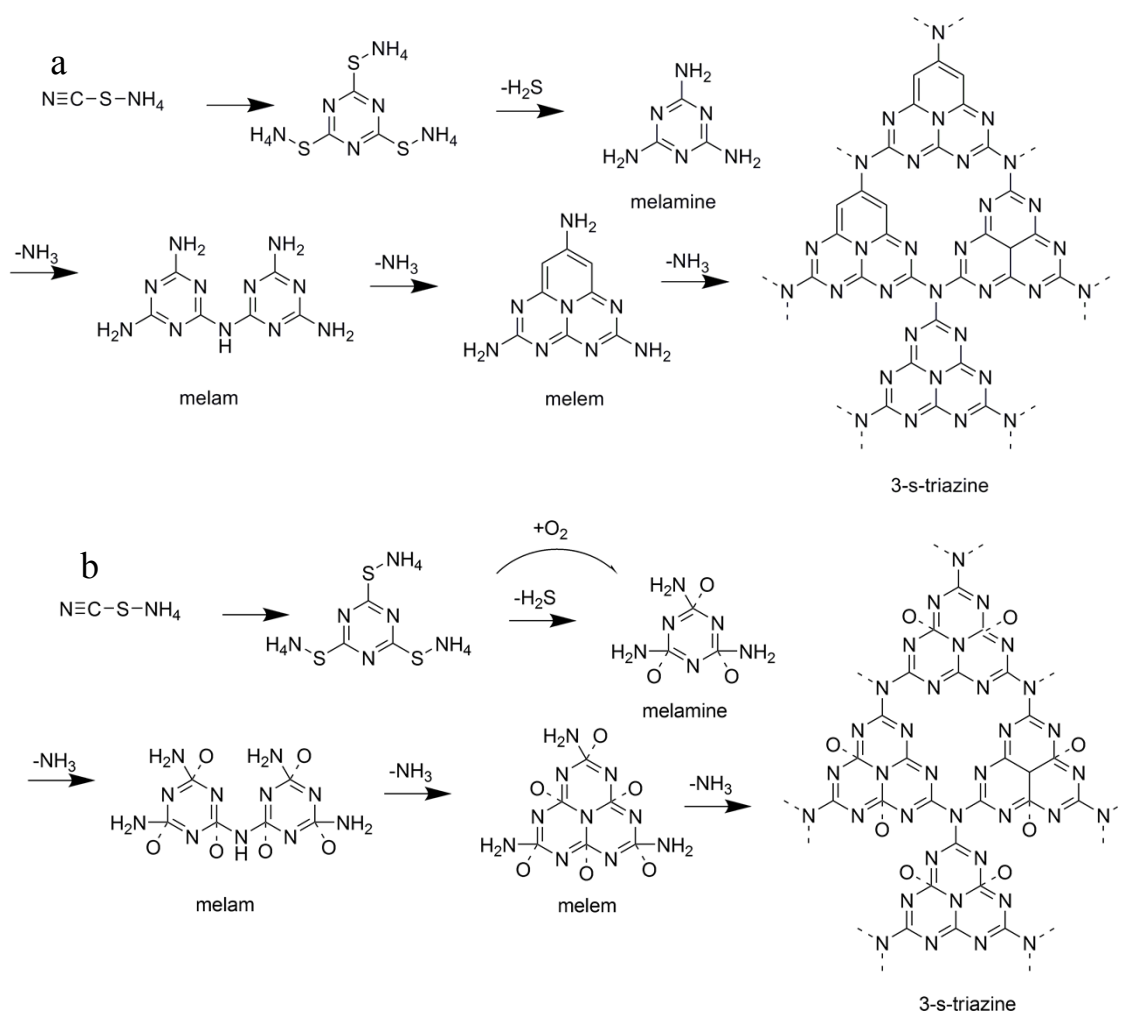

**Figure S3.** TG-DSC thermograms of g-C<sub>3</sub>N<sub>4</sub> nanosheets.

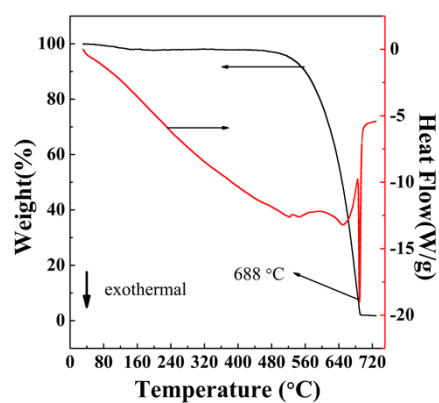

**Figure S4.** X-ray photoelectron spectra for the g-C<sub>3</sub>N<sub>4</sub> and N-TiO<sub>2</sub>/g-C<sub>3</sub>N<sub>4</sub> (1:3) composite.

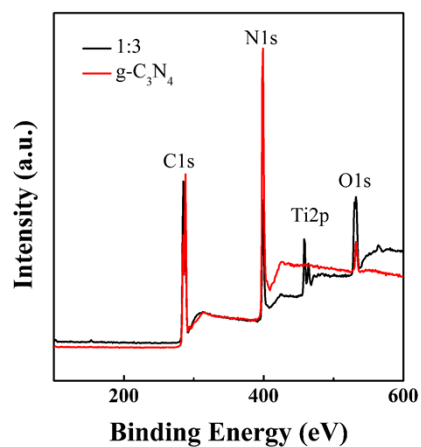

**Figure S5.** UV-vis diffuse reflectance spectra (a) and plots of  $(\alpha h\nu)^2$  versus photon energy ( $h\nu$ ) (b) of N-TiO<sub>2</sub>, g-C<sub>3</sub>N<sub>4</sub> and the N-TiO<sub>2</sub>/g-C<sub>3</sub>N<sub>4</sub> (1:3) heterojunctions.

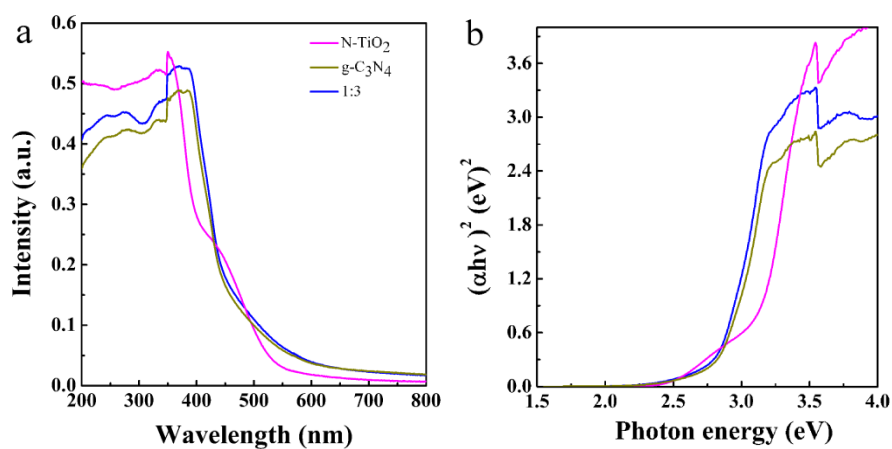

**Figure S6.** Nitrogen adsorption-desorption isotherms (a) and the corresponding BJH pore-size distribution curves (b) of N-TiO<sub>2</sub> nanoparticles, g-C<sub>3</sub>N<sub>4</sub> nanosheets and 1:3 N-TiO<sub>2</sub>/g-C<sub>3</sub>N<sub>4</sub> heterojunctions.

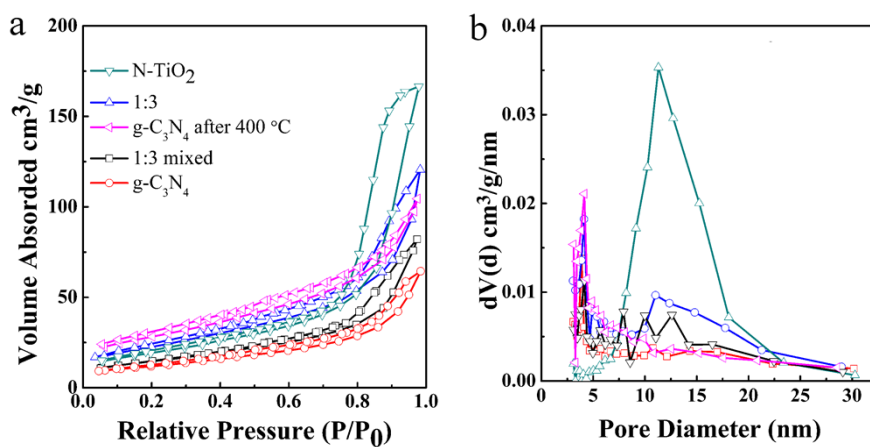

**Figure S7.** Evolution of UV-vis spectra of the RhB solution in the presence of g-C<sub>3</sub>N<sub>4</sub>/N-TiO<sub>2</sub> (1:3) heterojunctions under continuous stirring first in dark (a) and then under visible-light irradiation (b).

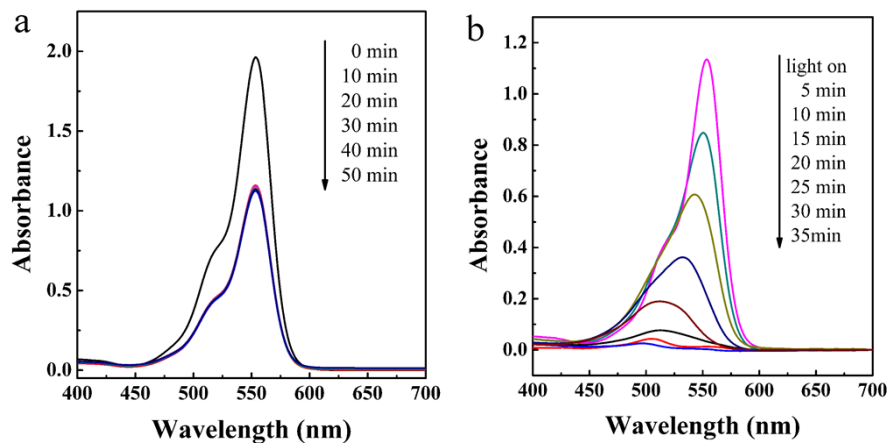

**Figure S8.** Degradation of RhB over N-TiO<sub>2</sub>, g-C<sub>3</sub>N<sub>4</sub> nanosheets and their heterojunctions (a) and N-TiO<sub>2</sub>, p-g-C<sub>3</sub>N<sub>4</sub> and their heterojunctions (b) fitted by a pseudo-first-order kinetic model.

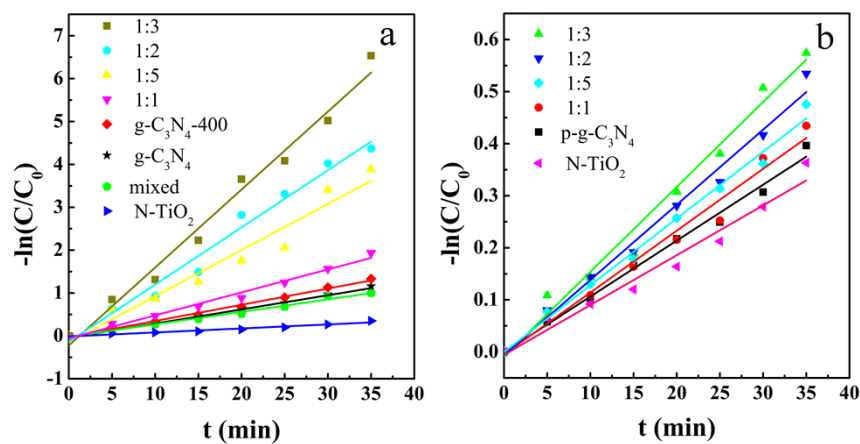

**Figure S9.** XRD patterns (a) and FT-IR spectra (b) of the as-prepared N-TiO<sub>2</sub>/g-C<sub>3</sub>N<sub>4</sub> photocatalyst before and after seven cycles of RhB degradation.

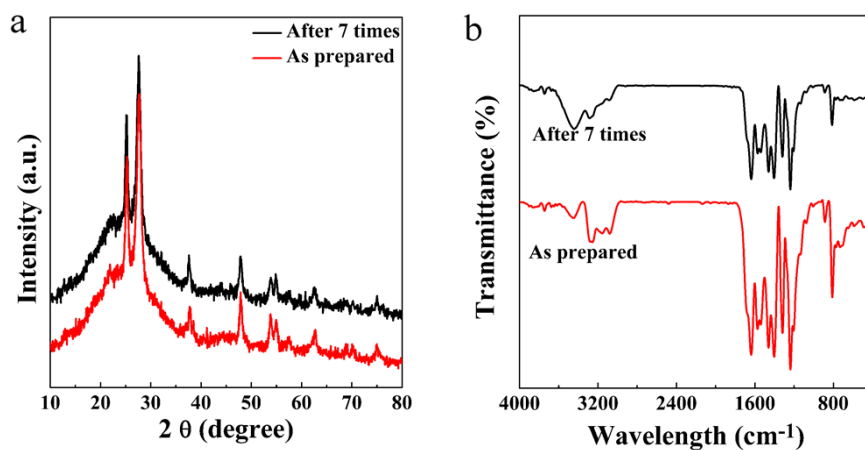

**Figure S10.** SEM image of the N-TiO<sub>2</sub>/g-C<sub>3</sub>N<sub>4</sub> photocatalyst after seven cycles of RhB degradation.

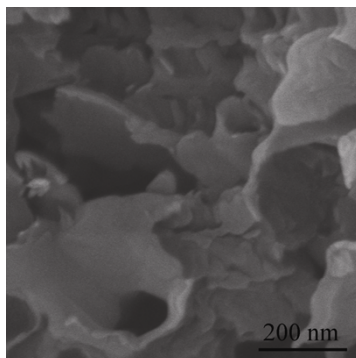

Supplement: c5ra04100g1.pdf [file c5ra04100g1.pdf]
